# Supplementary material for: Photocatalytic reduction of aromatic azides to amines using CdS and CdSe nanoparticles
Source: Royal Society of Chemistry journal article supplement (doi:10.1039/b404268a), 2004-06-09
Supplement: b404268a.pdf [file b404268a.pdf]

# Supporting Information

## Photocatalytic Reduction of Aromatic Azides to Amines using CdS and CdSe Nanoparticles

Manoj Warrier,<sup>a</sup> Fung Ku Lo,<sup>b</sup> Harold G. Monbouquette<sup>b\*</sup> and Miguel A. Garcia-Garibay<sup>a\*</sup>

<sup>a</sup>*Departments of Chemistry and Biochemistry and* <sup>b</sup>*Chemical Engineering, University of California, Los Angeles, CA 90095-1569*

### **I. Synthesis of cadmium sulfide and cadmium selenide nanoparticles**

*A. Materials:* Cadmium chloride ( $\text{CdCl}_2$ ), 2-aminoethanethiol hydrochloride (thiol-1), 2-(N,N-dimethylamino)ethanethiol hydrochloride (thiol-2) and 2-(N,N-diethylamino)ethanethiol hydrochloride (thiol-3) were obtained from Aldrich and were used without further purification. Sodium selenide metal-based ( $\text{Na}_2\text{Se}$ ) from Alfa Aesar was used without purification.

*B. Preparation of cadmium selenide nanoparticles (CdSe):* A sample of 400 ml of deionized water was brought to a boil. It was sparged continuously with argon while cooling to room temperature. To 150 ml of the boiled deionized water, 27.8 mg (0.152 mmol) of  $\text{CdCl}_2$  was added. Once all the powder was dissolved, 490 mg (3.5 mmol) of thiol-2 {400 mg (3.5 mmol) of thiol-1; 590 mg (3.5 mmol) of thiol-3} was added to the solution. The pH of the mixture was approximately 3.3 and there was no observable color to the solution. The pH was adjusted to 7.8 by dropwise addition of 1 M NaOH. In a separate flask, another solution was prepared by dissolving 12 mg (0.096 mmol) of  $\text{Na}_2\text{Se}$

in 25 ml of boiled deionized water {9 mg (0.076 mmol) of thiol-1, or 15 mg (0.120 mmol) if thiol-3 is used}. The red solution solution was added immediately to the cadmium/thiol with vigorous swirling over two to three minutes. During addition, the color of the mixture gradually turned from colorless to yellowish-green (transparent) and the final pH was measured at 7.9. The growth of nanoparticles was monitored by measuring the absorbance over time.

*C. Preparation of cadmium sulfide nanoparticles (CdS):* The procedure was repeated as described previously for the CdSe particles. Typical amounts of reagents were as follows: 150 ml of boiled deionized water, 27.5 mg (0.15 mmol) of CdCl<sub>2</sub>, 398 mg (3.5 mmol) of thiol 1, 40 mg (0.096 mmol) of Na<sub>2</sub>S·9H<sub>2</sub>O in 25 ml of boiled deionized water. The growth of nanoparticles was monitored by measuring the absorbance over time.

## **II. Synthesis of Aromatic Azides**

*A. General.* NMR spectra were recorded on a Bruker ARX-400 spectrometer. A Hewlett Packard 8453 UV-Vis spectrophotometer was used to record UV-Vis spectra. IR spectra were acquired with a Perkin Elmer Paragon 100 FT-IR instrument. EI-HRMS was performed using a VG Autospec (Micromass: Beverly, MA) spectrometer.

*B. Materials.* Sodium azide (NaN<sub>3</sub>), sodium nitrite (NaNO<sub>2</sub>), and substituted anilines were obtained from Aldrich. Anhydrous magnesium sulfate (MgSO<sub>4</sub>) was obtained from Fisher Scientific. Hydrochloric acid 12 M was obtained from EM Science; Methanol-d<sub>4</sub> 99.8% (CD<sub>3</sub>OD) was obtained from Cambridge Isotope Laboratory. All materials were used as received. The aromatic azides synthesized for this work are listed in the table below.

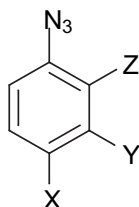

**1**

| Compound: | X                                  | Y                  | Z               |
|-----------|------------------------------------|--------------------|-----------------|
| <b>1a</b> | NO <sub>2</sub>                    | H                  | H               |
| <b>1b</b> | H                                  | NO <sub>2</sub>    | H               |
| <b>1c</b> | H                                  | H                  | NO <sub>2</sub> |
| <b>1d</b> | CO <sub>2</sub> H                  | H                  | H               |
| <b>1e</b> | H                                  | CO <sub>2</sub> H  | H               |
| <b>1f</b> | COMe                               | H                  | H               |
| <b>1g</b> | H                                  | OMe                | H               |
| <b>1h</b> | OMe                                | H                  | H               |
| <b>1i</b> | Cl                                 | H                  | H               |
| <b>1j</b> | (CH <sub>3</sub> ) <sub>2</sub> OH | H                  | H               |
| <b>1k</b> | MeO                                | NO <sub>2</sub>    | H               |
| <b>1l</b> | MeO                                | CO <sub>2</sub> Me | H               |

C. *Synthetic procedure.*<sup>1</sup> To a 300-mL round-bottom flask, 20 mmol of the corresponding amine and 50 mL of 6 M HCl were added. The flask containing the reaction mixture was then placed in ice for at least 15 minutes with stirring. Two separate solutions were prepared of 21 mmol NaNO<sub>2</sub> in 10 mL of deionized water and 21 mmol NaN<sub>3</sub> in 10 mL of deionized water. The solutions were cooled in an ice bath. After 15 minutes, the NaNO<sub>2</sub> solution was added dropwise to the reaction mixture of the amine in HCl. The addition was done over 15 minutes, followed by 15 minutes of stirring in ice. The cooled NaN<sub>3</sub> solution was then added to this reaction mixture dropwise. The addition was finished within 15 minutes followed by another 15 minutes of stirring in ice. The reaction mixture was extracted three times with 50 mL portions of diethyl ether. The organic layer was washed with 50 mL 0.5M HCl, followed by 50 mL of brine, dried over NaSO<sub>4</sub>, filtered and evaporated under reduced pressure in a round-bottom flask. The isolated yields for the different aromatic azides averaged between 85-95 %. All the analytical for aromatic azides **1a-1j** was consistent with those reported in the literature.<sup>2</sup>

(1) Patai, S. *The Chemistry of the Azido Group*, John Wiley & Sons: New York. 1971; p. 57.

(2)4-Nitroazidobenzene **1a**: (a) Dyll, L. K. *Aust. J. Chem.*, **1975**, 28, 2147-59; (b) Liang T.

*J. Am. Chem. Soc.*, **1987**, 109, 7803-10 ; 3-Nitroazidobenzene **1b**: Liang T. *J. Am. Chem. Soc.*,

The analytical data for compounds **1k** and **1l**, which are new compounds, are listed below. Copies of the  $^1\text{H}$  NMR,  $^{13}\text{C}$  NMR and FTIR spectra are included at the end of this document.

4-Methoxy-3-nitrophenylazide **1k**:  $^1\text{H}$  NMR (500 MHz,  $\text{CD}_3\text{OD}$ ):  $\delta$  3.91 (s, 3 H), 7.27-7.30 (m, 2 H), 7.46-7.47 (m, 1 H);  $^{13}\text{C}$  NMR (100 MHz,  $\text{CD}_3\text{OD}$ ):  $\delta$  55.9, 115.1, 115.2, 123.9, 132.6, 140.0, 149.6; IR (KBr,  $\text{cm}^{-1}$ ): 3116.8, 2116.2, 1527.7, 1347.5, 1273.7, 1183.5, 1015.5; HRMS calcd for  $\text{C}_7\text{H}_6\text{N}_4\text{O}_2$ : 194.0440, found 194.0441. m.p. 88.5-90.6°C.

Methyl 5-azido-2-methoxybenzoate **1l**:  $^1\text{H}$  NMR (500 MHz,  $\text{CD}_3\text{OD}$ ):  $\delta$  3.91 (s, 6H), 6.96 (d, 1 H,  $J = 9$  Hz), 7.10 (dd, 1 H,  $J_1 = 9$  Hz,  $J_2 = 3$  Hz), 7.47 (d, 1 H, 3 Hz);  $^{13}\text{C}$  NMR (100 MHz,  $\text{CD}_3\text{OD}$ ):  $\delta$  52.2, 56.3, 113.5, 121.1, 121.9, 123.7, 132.1, 156.3, 165.6. IR (KBr,  $\text{cm}^{-1}$ ): 3043.6, 2957.0, 2120.4, 1709.5, 1500.8, 1433.8, 1314.5, 1247.5, 1016.4; HRMS calcd for  $\text{C}_9\text{H}_9\text{N}_3\text{O}_3$ : 207.0644, found 207.0643. m.p. 41.5-44.4°C.

### III. The photocatalyzed reduction of aromatic azide to aromatic amine.

A. *Materials*: Sodium formate ( $\text{HCO}_2\text{Na}$ ) was obtained from Aldrich; 0.05 M potassium phosphate monobasic – sodium hydroxide pH 7.00 buffer (buffer) and magnesium sulfate anhydrous ( $\text{MgSO}_4$ ) were obtained from Fisher Scientific; Sodium hydroxide GR was obtained from EM Science; Methanol- $\text{d}_4$  99.8% ( $\text{CD}_3\text{OD}$ ) was obtained from Cambridge Isotope Laboratory. All materials were used directly without purification. All the aromatic azides used in the study were prepared by diazotization of

---

**1987**, 109, 7803-10; 2-Nitroazidobenzene **1c**: Dyall, L. K. *Aust. J. Chem.*, **1975**, 28, 2147-59; 4-Azidobenzoic acid **1d**: Liu, Q. *Organic Letters*, **2003**, 5, 2571-72; 3-Azidobenzoic acid **1e**: Tisler, M., *Vestnik Slovenskega Kemijskega Drustva*, **1979**, 26, 163-71; 4-Acetyl-azidobenzene **1f**: Liu, Q. *Organic Letters*, **2003**, 5, 2571-72; 3-Azidoanisole **1g**: Nunno, L. D., *Tetrahedron*, **1986**, 42, 3913-20; 4-Azidoanisole **1h**: Nunno, L. D., *Tetrahedron*, **1986**, 42, 3913-20; 4-Azido-

commercially available aromatic amines with sodium nitrate/HCl followed by addition of sodium azide.

*B. Photocatalysis Experiments:* In a Pyrex tube, 5 mg of the respective azide was dissolved in 0.5 ml of methanol, 4.5 ml of  $\text{HCO}_2\text{Na}$  (0.750 M in water, pH 7.0) and 5 ml of CdS/CdSe nanoparticle solution. This is the reaction mixture. In another tube, 5 mg of the same azide was dissolved in 5 ml of methanol and 5 ml of the corresponding aminethiol solution (thiol 1, 2 or 3 depending on which one is used as the capping agent for nanoparticle preparation). This is the control mixture. The reaction and the control were photolyzed simultaneously in a “black box”, with continuous stirring, for 15 minutes. An Oriel 1 kW Xe/Hg Lamp (Oriel Lamp) was employed as the radiation source. Two separate experiments were done with 400 nm and 420 nm cut-off filters. The mixture in each tube was extracted using the following protocol: The reaction mixture was transferred to a separatory funnel. The reaction tube was filled and rinsed with 15 ml of ethyl acetate, which was also transferred to the separatory funnel. The layers were separated after vigorous shaking and the ethyl acetate layer was saved. The aqueous layer was extracted two more times with 15 ml of ethyl acetate. The ethyl acetate layers were combined and washed with 5 ml of brine. The organic layer was dried using  $\text{MgSO}_4$ , filtered and evaporated under reduced pressure. The dried samples were re-dissolved in  $\text{CD}_3\text{OD}$  and analyzed by  $^1\text{H}$  NMR. Samples **1f**, **1g**, and **1i** were too volatile, which resulted in sample loss while preparing the samples for NMR and were analyzed by G.C instead. The NMR measurements were done on a Bruker ARX-400 spectrometer. A Hewlett-Packard HP-5890 series II gas chromatograph equipped with a flame ionization

---

chlorobenzene **1i**: Dyll, L. K. *Aust. J. Chem.*, **1975**, 28, 2147-59; 2-(4-Azidophenyl)ethanol **1j**:

detector (FID) and a HP 3396 series II integrator was used to collect the G.C data. A Hewlett Packard HP-1 column (25m X 0.20 mm; 0.20  $\mu$ m film thickness) was used. A Hewlett Packard 8453 UV-VIS spectrophotometer was used to record UV-VIS spectra.

#### IV. Quantum yield measurements.

Quantum yields of the reaction were determined using Reinecke salt  $[\text{KCr}(\text{NH}_3)_2(\text{NCS})]$  actinometry<sup>3</sup> using Nessler's reagent to detect the presence of ammonium ions as reported by Wegner *et al.*<sup>4</sup> Nessler's reagent was prepared using the following procedure:<sup>5</sup> 3.5g of KI, and 5.0g of  $\text{HgI}_2$  were mixed in flask A, which contained 20 mL of deionized water. In flask B, 5.0 g of sodium hydroxide (NaOH) was dissolved in 25 mL of deionized water. The solutions were mixed and the total volume was adjusted to 50.0 mL using a volumetric flask. The solution was stored in a brown reagent bottle to avoid light, for one week. The solution was filtered before use.

A solution of ferric perchlorate (or FP) was made by mixing 0.1 M  $\text{FeNO}_3$  (2.43 g in 100 mL) and 0.1 M  $\text{HClO}_4$  (4.3 mL of a 70% stock) in a volumetric flask. The total volume of the solution is adjusted to 100.0 mL. This solution was used to detect the presence of ammonium and was also used to complex with free isothiocyanate ions, giving a characteristic  $\lambda_{\text{max}}$  close to 450 nm.

In a room with dim red light, 1.0 g (or 0.003 mol) of potassium reineckate (K-Rein) was recrystallized with 3 times excess of  $\text{KNO}_3$  (0.94 g, 0.009 mol) from the A-Rein with

---

Brems, D. N., *Biochemistry*, **1979**, 18, 860-2 .

(3) Murov, S. L.; Carmichael, I.; Hug, G. L. *Handbook of Photochemistry*; 2nd ed.; Marcel Dekker, Inc.: New York, NY, 1993.

(4) Wegner, E. E.; Adamson, A. W. *J. Am. Chem. Soc.* **1966**, 88, 394.

(5) Weast, R. C. *CRC Handbook of Chemistry and Physics*; CRC Press: Boca Raton, FL, 1979.

warm water at 40-50°C for 5 to 10 times. The crystals were filtered, and a portion of the salt was re-dissolved in water and tested with both Nessler's Reagent and FP solution. Both solutions turn brown when ammonium ions are present. Otherwise, the material is dried under reduced pressure overnight.

Photolysis was carried out in the same pyrex tubes that were used to carry out the photocatalytic reductions. A tube containing 10 mL of an aqueous K-Rein solution at an absorbance of about 0.80 between 390nm and 410 nm, which corresponded to roughly 27.5 mg of salt in 10 mL,  $V_1$ , deionized water (approximately 0.008 M), was placed into the blackbox. The photocatalytic reduction of 4-azidobenzoic acid using CdSe nanoparticles was performed alongside. A bandgap filter, between 390 and 410 nm, was placed between the window of the blackbox and the Oriel Xe/Hg 6253 Lamp. The mixture was kept stirring during the 30 minutes-long photolysis. A tube containing 10 mL of the same solution was placed away from light for 30 minutes simultaneously. This was the blank.

Immediately upon completing the photolysis, 5.0 mL of the solution ( $V_2$ ) was diluted 5 folds with deionized water (a new total volume,  $V_3$ , of 25 mL). 1.0 mL of this solution was mixed with 1.0 mL of FP solution. The absorbance of the mixture at 450 nm was recorded. This entire procedure was repeated at least 3 times for the same sample and the entire photolysis was repeated 3 times. The net absorbance of each trial corresponded to the difference of sample absorbance and blank absorbance at 450 nm. The quantum yield of the photocatalytic reduction was calculated for the conversion of aromatic azide to aromatic amines determined by  $^1\text{H-NMR}$ .

Current Data Parameters  
 NAME Fa2003-Set7  
 EXPNO 3  
 PROCNO 1

F2 - Acquisition Parameters  
 Date\_ 20031009  
 Time 16.23  
 INSTRUM avance500  
 PROBHD 5 mm bb-Z

PULPROG zg30  
 TD 32768  
 SOLVENT CDC13  
 NS 20  
 DS 0  
 SWH 10000.000 Hz  
 FIDRES 0.305176 Hz  
 AQ 1.6384500 sec  
 RG 128  
 DM 50.000 usec  
 DE 6.00 usec  
 TE 300.0 K  
 D1 2.00000000 sec

===== CHANNEL f1 =====  
 NUC1 1H  
 P1 12.00 usec  
 PL1 0.00 dB  
 SF01 500.3330020 MHz

F2 - Processing parameters  
 SI 32768  
 SF 500.3300220 MHz  
 WDW EM  
 SSB 0  
 LB 0.30 Hz  
 GB 0  
 PC 1.00

1D NMR plot parameters  
 CX 20.00 cm  
 F1P 8.000 ppm  
 F1 4002.64 Hz  
 F2P 0.000 ppm  
 F2 0.00 Hz  
 PPMCM 0.40000 ppm/c  
 HZCM 200.13200 Hz/cr

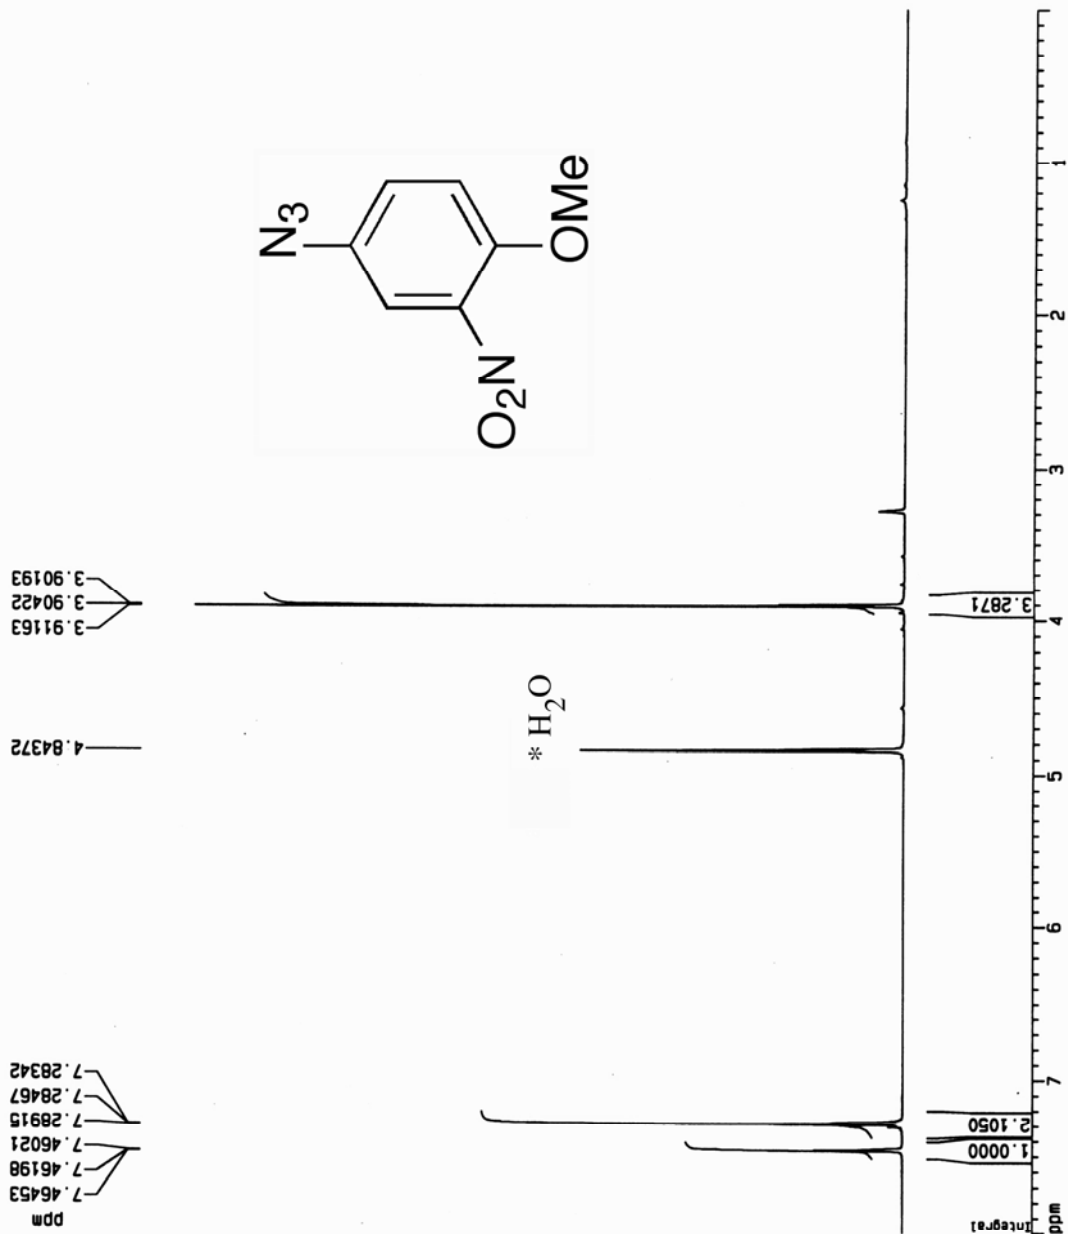



Current Data Parameters  
 NAME Fa2003-Set7  
 EXPNO 2  
 PROCNO 1

F2 - Acquisition Parameters  
 Date\_ 20031009  
 Time 16.19  
 INSTRUM avance500  
 PROBHD 5 mm bb-Z

PULPROG zgpg30  
 TD 65536  
 SOLVENT ~~acetone~~ *Methanol D4*  
 NS 300  
 DS 0  
 SWH 32679.738 Hz  
 FIDRES 0.498653 Hz  
 AQ 1.0027508 sec  
 RG 8192  
 DM 15.300 usec  
 DE 6.00 usec  
 TE 300.0 K  
 D1 2.00000000 sec  
 d11 0.03000000 sec

===== CHANNEL f1 =====  
 NUC1 <sup>13</sup>C  
 P1 5.25 usec  
 PL1 0.00 dB  
 SF01 125.8231939 MHz

===== CHANNEL f2 =====  
 CPDPRG2 waltz16  
 NUC2 <sup>1</sup>H  
 PCPD2 105.00 usec  
 PL2 120.00 dB  
 PL12 19.00 dB  
 SF02 500.3320013 MHz

F2 - Processing parameters  
 SI 65536  
 SF 125.8080969 MHz  
 WDW EM  
 SSB 0  
 LB 1.00 Hz  
 GB 0  
 PC 1.40

1D NMR plot parameters  
 CX 20.00 cm  
 F1P 249.879 ppm  
 F1 31436.84 Hz  
 F2P -9.879 ppm  
 F2 -1242.90 Hz  
 PPMCM 12.98793 ppm/cm  
 HZCM 1633.98694 Hz/cm

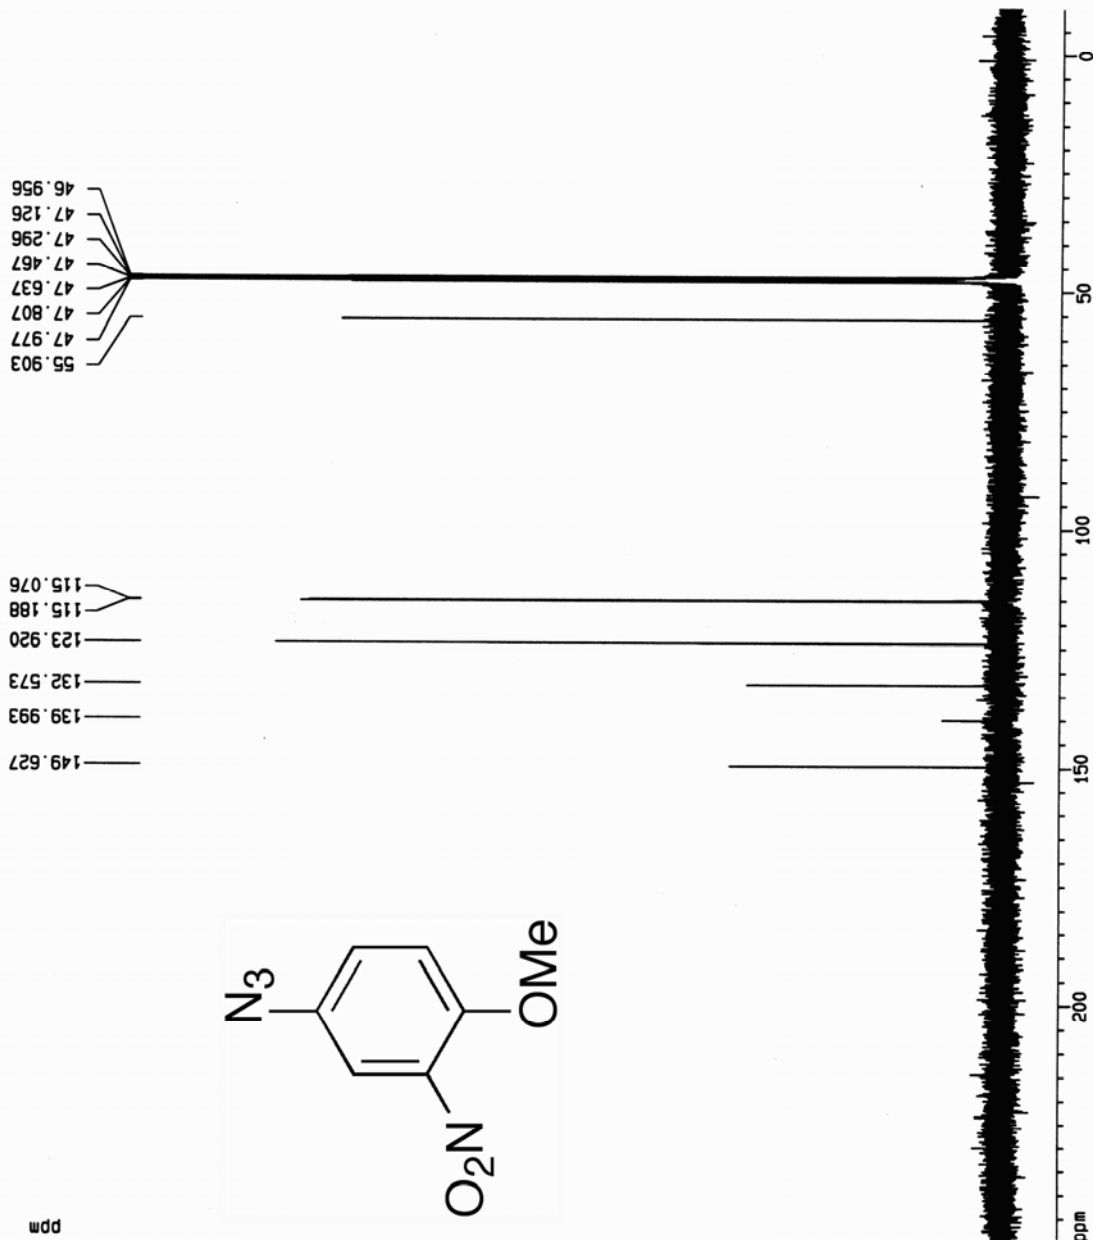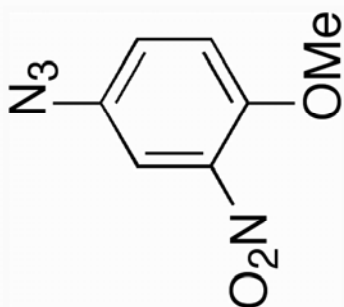

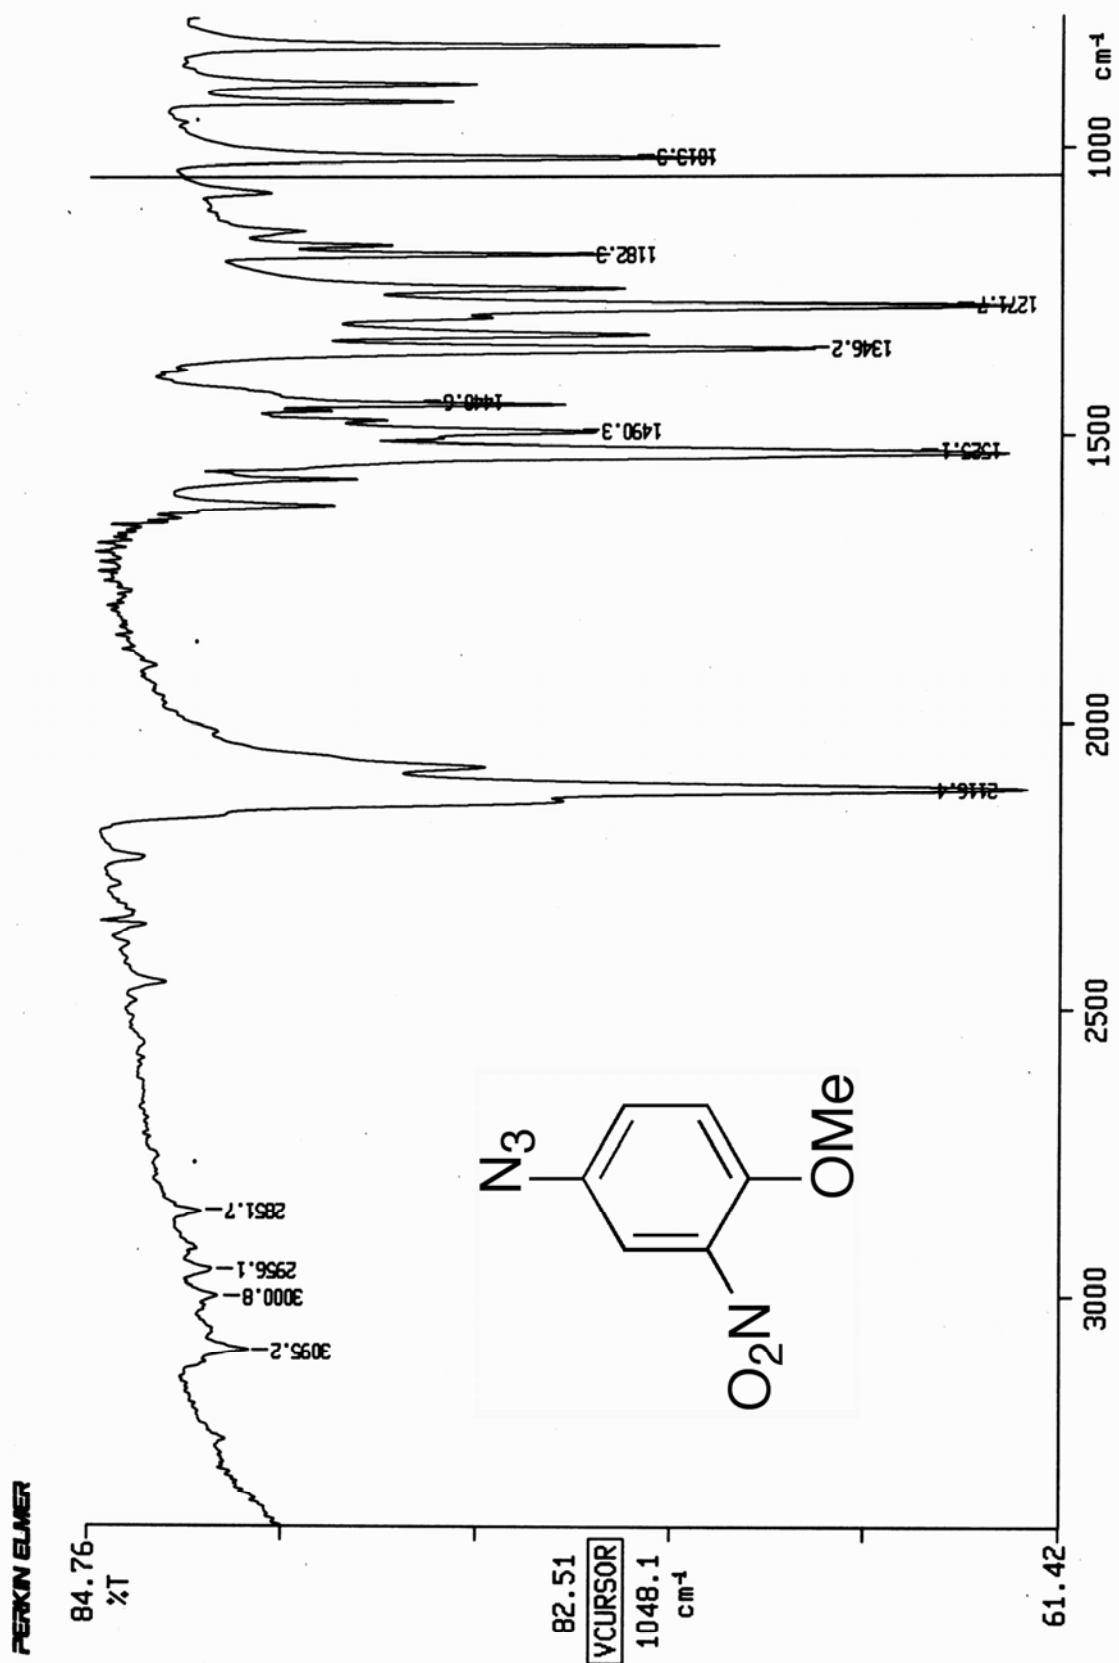

Current Data Parameters  
 NAME Fa2003-Set4  
 EXPNO 1  
 PROCNO 1

F2 - Acquisition Parameters  
 Date\_ 20031007  
 Time 17:57  
 INSTRUM avance500  
 PROBHD 5 mm bb-Z

PULPROG zg30  
 TD 32768  
 SOLVENT CDC13  
 NS 20  
 DS 0  
 SWH 10000.000 Hz  
 FIDRES 0.305176 Hz  
 AQ 1.6384500 sec  
 RG 128  
 DM 50.000 usec  
 DE 6.00 usec  
 TE 300.0 K  
 D1 2.0000000 sec

===== CHANNEL f1 =====  
 NUC1 <sup>1</sup>H  
 P1 12.00 usec  
 PL1 0.00 dB  
 SF01 500.3330020 MHz

F2 - Processing parameters  
 SI 32768  
 SF 500.3300220 MHz  
 MDW EM  
 SSB 0  
 LB 0.30 Hz  
 GB 0  
 PC 1.00

1D NMR plot parameters  
 CX 20.00 cm  
 F1P 8.000 ppm  
 F1 4002.64 Hz  
 F2P 0.000 ppm  
 F2 0.00 Hz  
 PPMCM 0.40000 ppm/c  
 HZCM 200.13200 Hz/cr

3.88924  
 3.88346

6.95094  
 6.96871  
 7.09066  
 7.09227  
 7.09624  
 7.09813  
 7.11001  
 7.11394  
 7.11588  
 7.45900  
 7.46324  
 7.46480

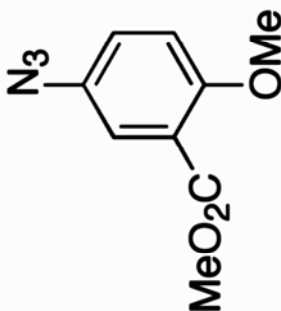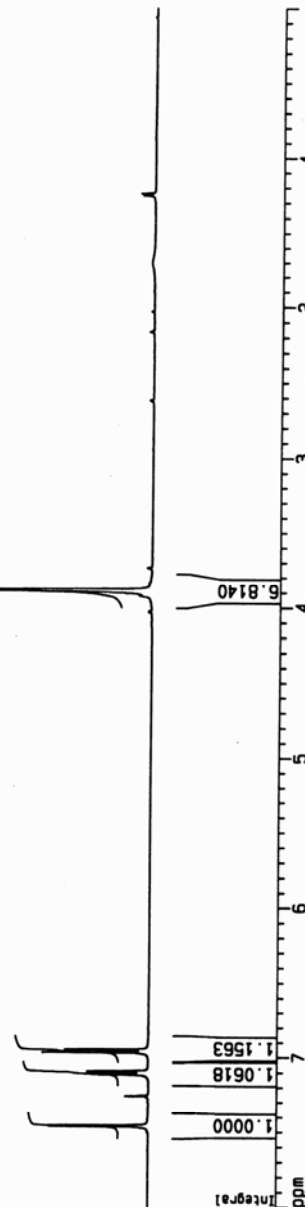

Current Data Parameters  
 NAME Fa2003-Set4  
 EXPNO 2  
 PROCNO 1

F2 - Acquisition Parameters  
 Date\_ 20031007  
 Time 18.23  
 INSTRUM avance500  
 PROBHD 5 mm BB-Z

PULPROG zgpg30  
 TD 65536  
 SOLVENT CDCl3  
 NS 300  
 DS 0  
 SMH 32579.738 Hz  
 FIDRES 0.498653 Hz  
 AQ 1.0027508 sec  
 RG 4096  
 DW 15.300 usec  
 DE 6.00 usec  
 TE 300.0 K  
 D1 2.00000000 sec  
 d11 0.03000000 sec

===== CHANNEL f1 =====  
 NUC1 13C  
 P1 5.25 usec  
 PL1 0.00 dB  
 SF01 125.8231939 MHz

===== CHANNEL f2 =====  
 CPDPRG2 waltz16  
 NUC2 1H  
 PCPD2 105.00 usec  
 PL2 120.00 dB  
 PL12 19.00 dB  
 SF02 500.3320013 MHz

F2 - Processing parameters  
 SI 65536  
 SF 125.8080969 MHz  
 MVM EM  
 SSB 0  
 LB 1.00 Hz  
 GB 0  
 PC 1.40

1D NMR plot parameters  
 CX 20.00 cm  
 FIP 180.000 ppm  
 F1 22645.46 Hz  
 F2 0.000 ppm  
 F2 0.00 Hz  
 PPMCM 9.00000 ppm/cm  
 HZCM 1132.27263 Hz/cm

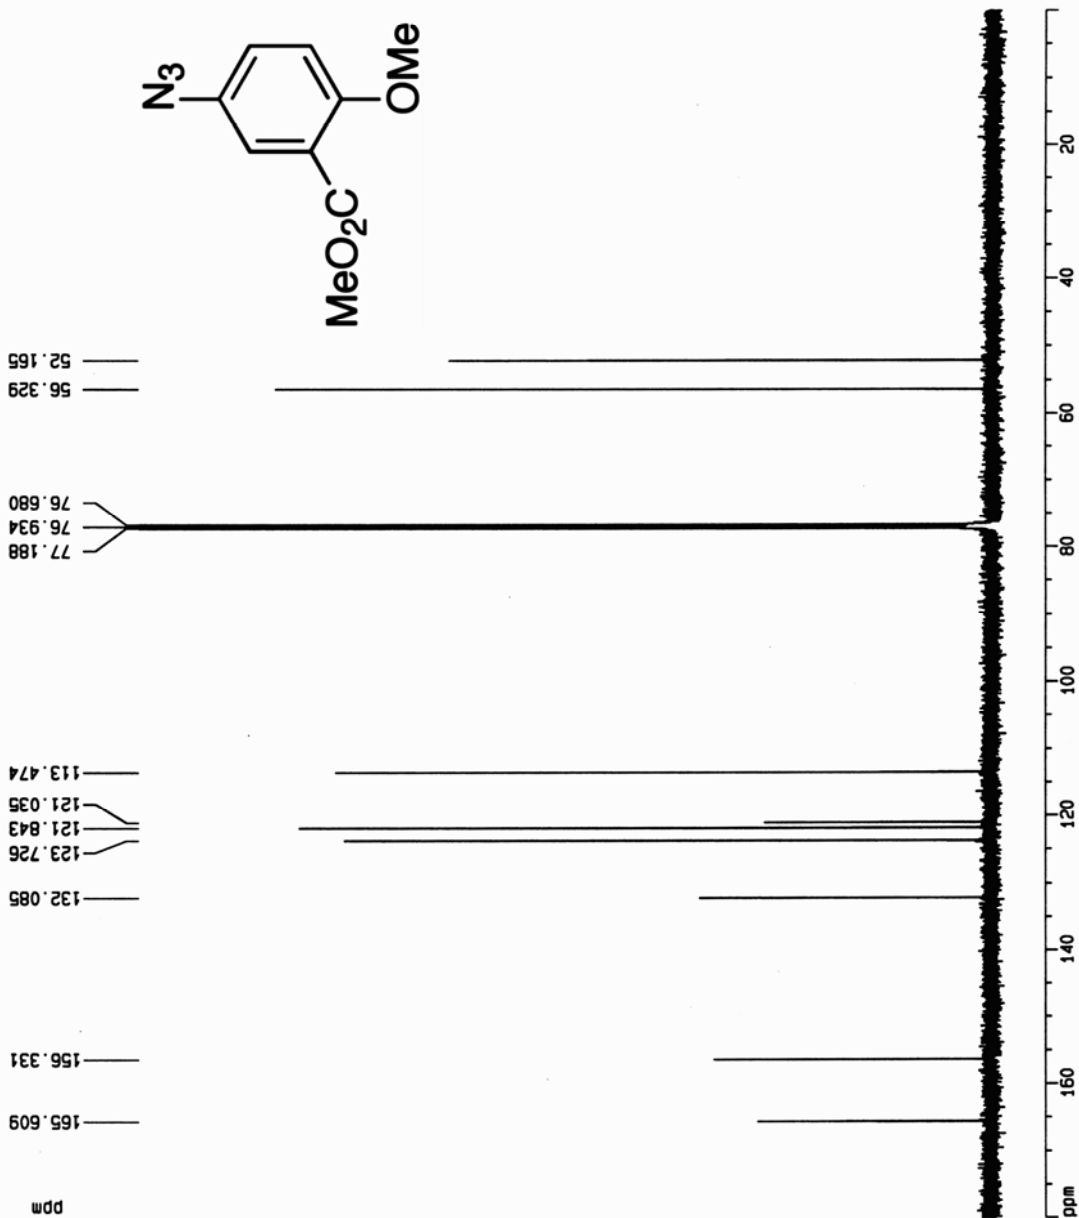

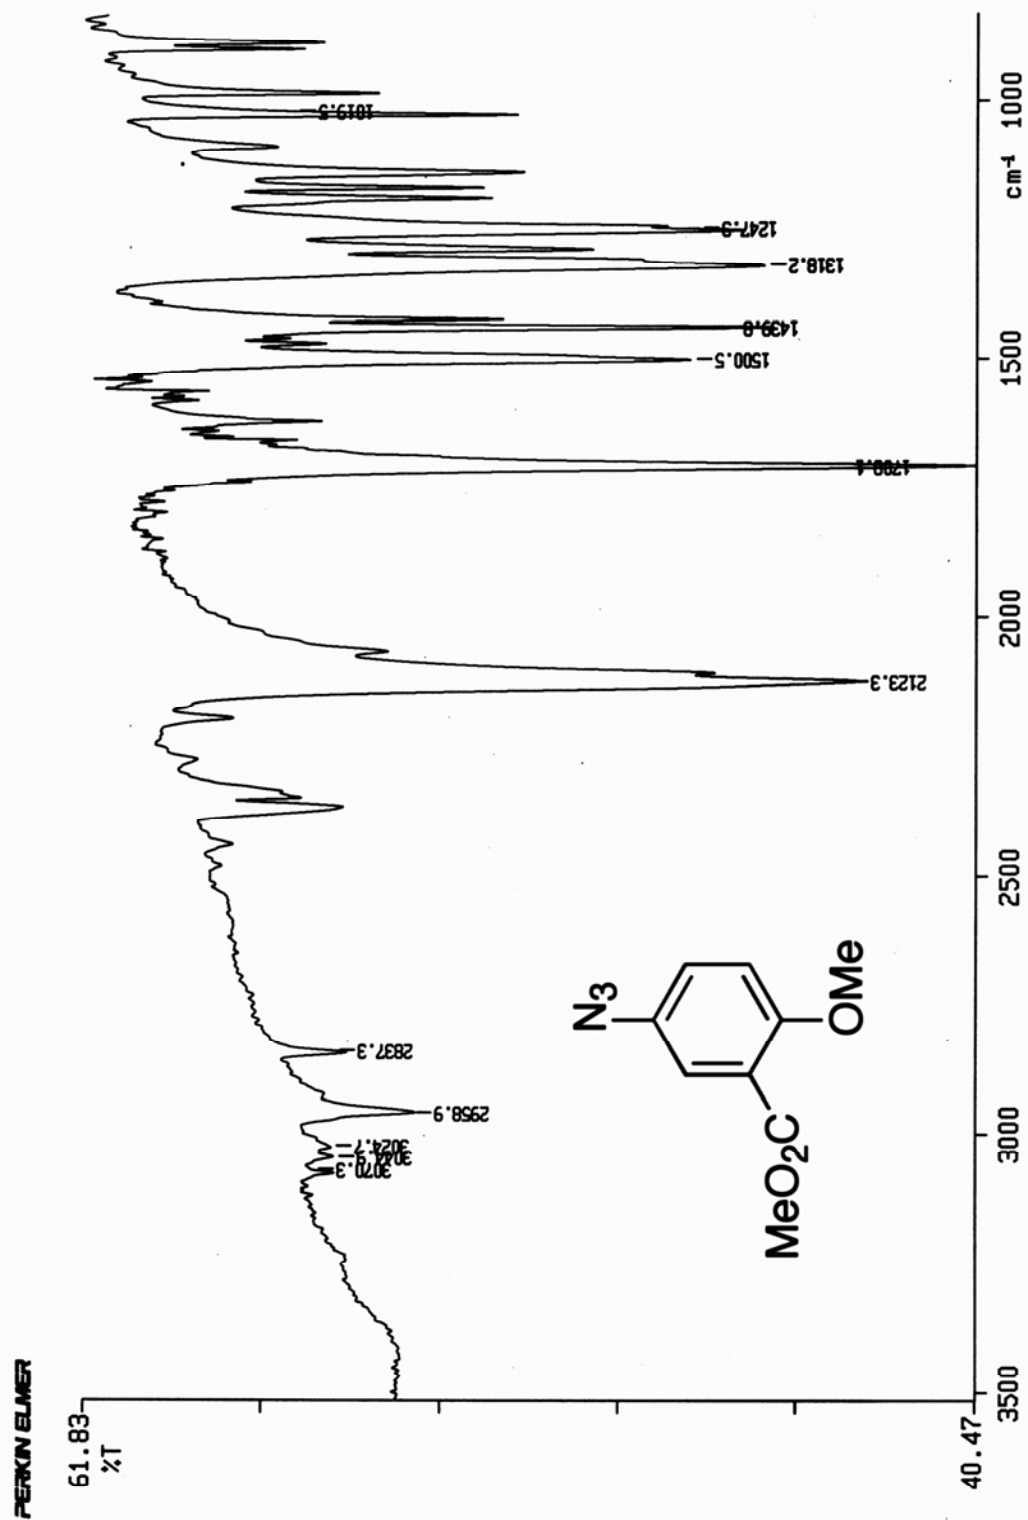

03/10/08 09:16 CHEMISTRY  
X: 1 scan, 4.0cm-1
